# Supplementary material for: At the Edges of Photosynthetic Metabolic Plasticity—On the Rapidity and Extent of Changes Accompanying Salinity Stress-Induced CAM Photosynthesis Withdrawal
Source: MDPI journal article supplement (doi:10.3390/ijms22168426), 2021-08-05
Supplement: s1 [file s1]

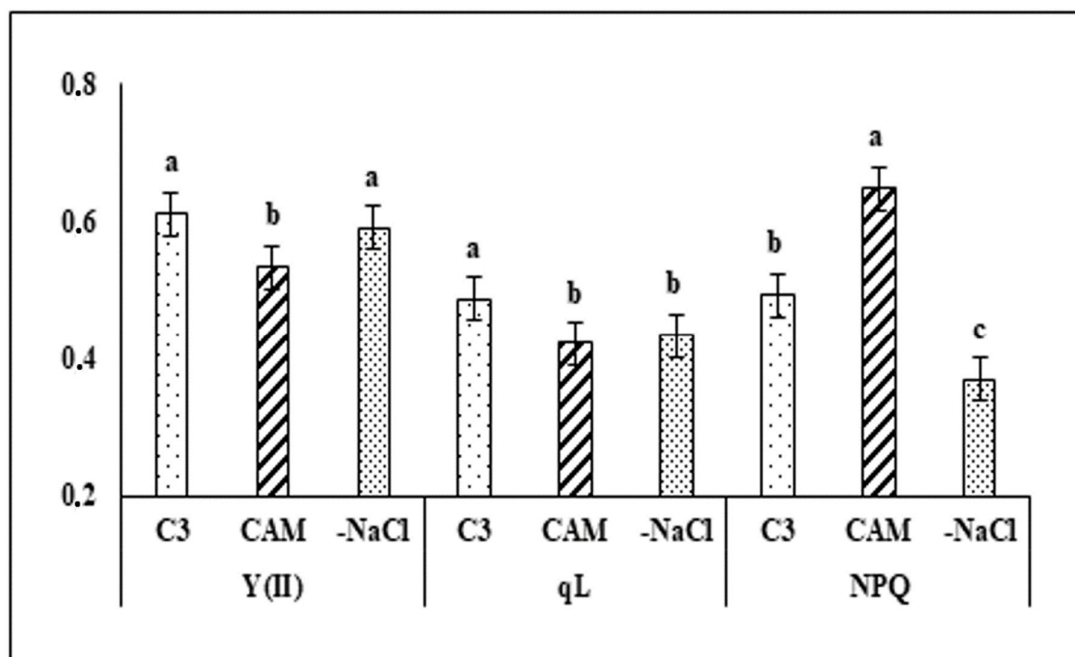

**Figure S1.** Second replication of the experiment. Quantum efficiency of PSII—Y(II), photochemical quenching coefficient—qL and non-photochemical quenching—NPQ in leaves of unstressed control (C<sub>3</sub>), NaCl-treated (CAM) and salt-stress withdrawn (-NaCl) *Mesembryanthemum crystallinum* L. plants measured in the middle of the light phase 72 hours past osmotic stress removal. Bars represent mean values ( $\pm$ SD) for  $n=5$ . Different letters indicate statistically significant differences according to Tukey's HSD test at  $p \leq 0.05$ .

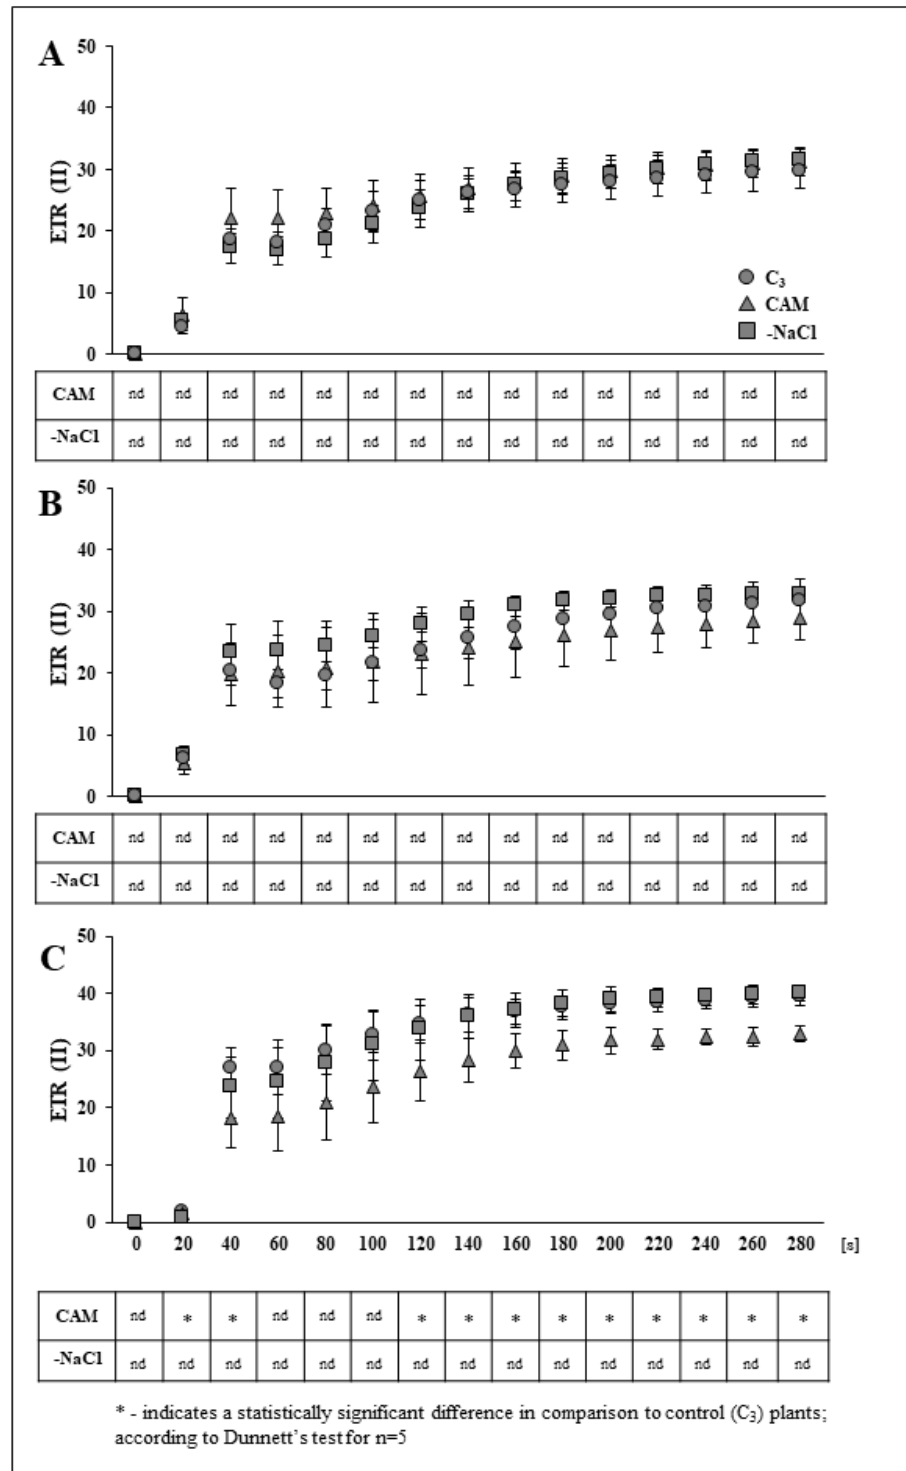

**Figure S2.** Second replication of the experiment. Induction curves of the PSII electron transport rate in leaves of unstressed control (C<sub>3</sub>), NaCl-treated (CAM) and salt-stress-withdrawn (-NaCl) *Mesembryanthemum crystallinum* L. plants measured in the middle of the light phase 24 (A), 48 (B) and 72 (C) hours past osmotic stress removal. Asterisk indicates a statistically significant difference in comparison to unstressed control (C<sub>3</sub>) plants according to Dunnett's test for  $n=5$ . nd, no differences; [s], seconds

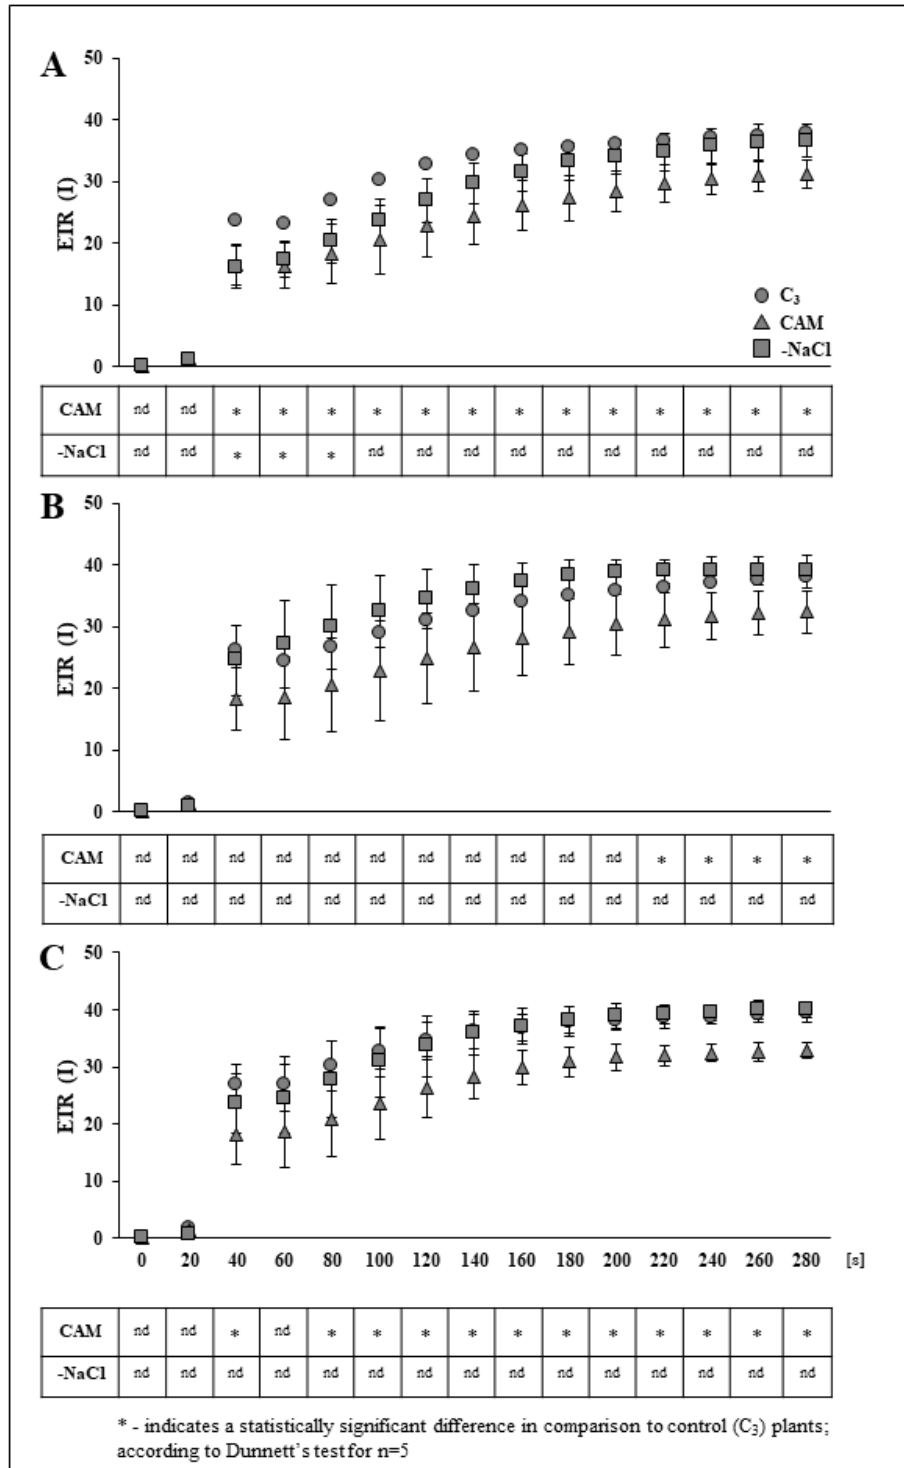

**Figure S3.** Second replication of the experiment. Induction curves of the PSI electron transport rate in leaves of unstressed control (C<sub>3</sub>), NaCl-treated (CAM) and salt-stress withdrawn (-NaCl) *Mesembryanthemum crystallinum* L. plants measured in the middle of Table 24. (A), 48 (B) and 72 (C) hours past osmotic stress removal. Asterisk indicates a statistically significant difference in comparison to unstressed control (C<sub>3</sub>) plants according to Dunnett's test for n=5; nd, no differences; [s], seconds

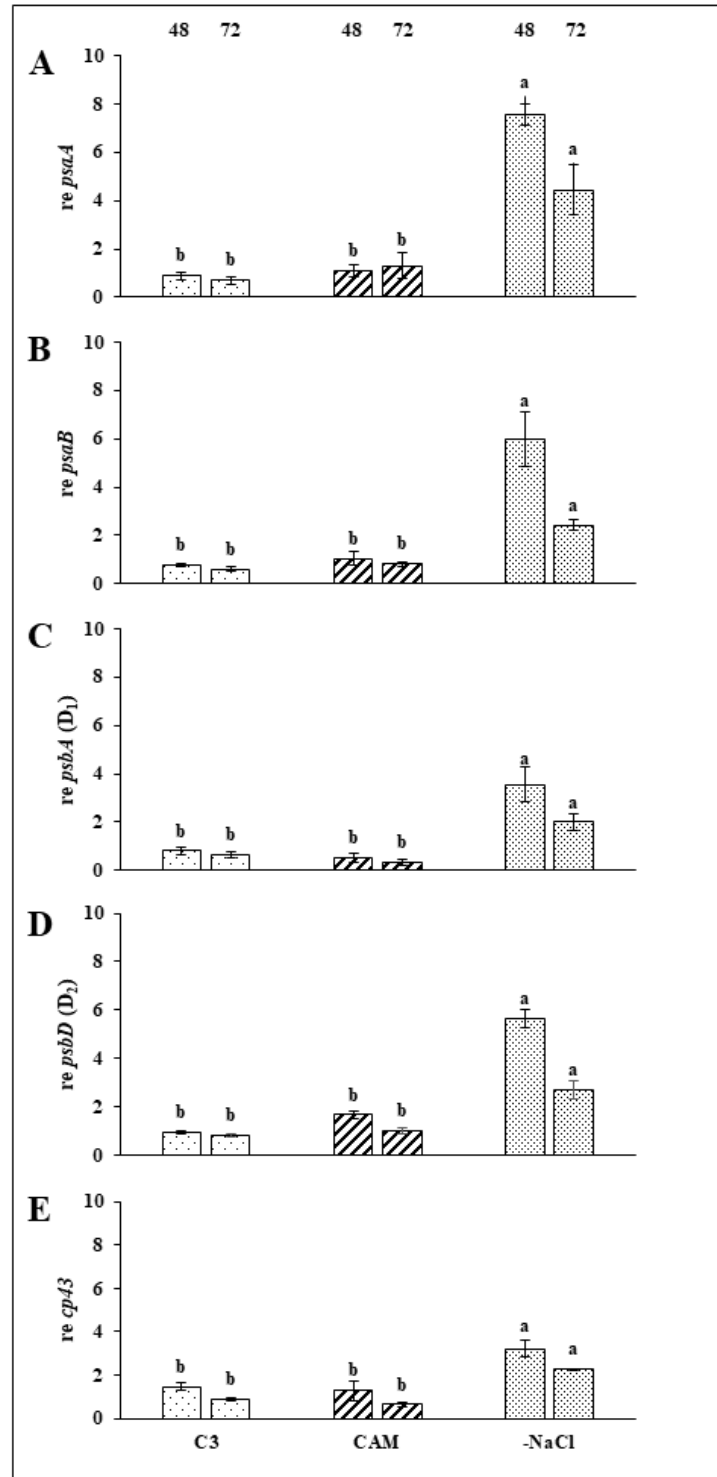

**Figure S4.** Second replication of the experiment. Relative expression of PSI-A core protein of photosystem I—*PSAA* (A), PSI-B core subunit of photosystem I—*PSAB* (B), D<sub>1</sub> protein of photosystem II—*PSBA* (C), D<sub>2</sub> protein of photosystem II—*PSBD* (D) and cp43 protein of photosystem II—*cp43* (E) in leaves of unstressed control (C<sub>3</sub>), NaCl-treated (CAM) and salt-stress withdrawn (-NaCl) *Mesembryanthemum crystallinum* L. plants measured 48 and 72 hours past osmotic stress removal. Bars represent mean values (±SD) for *n*=5. Different letters indicate statistically significant differences according to Tukey's HSD test at *p* ≤ 0.05.

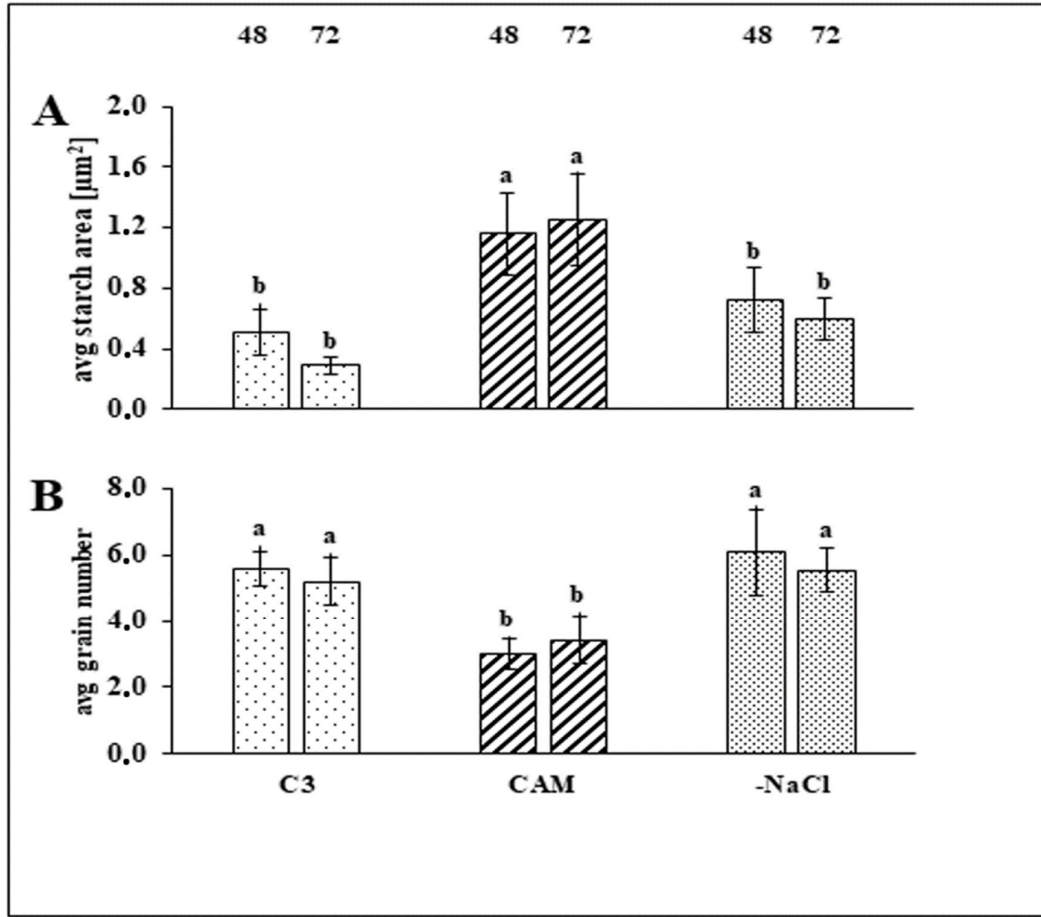

**Figure S5.** Second replication of the experiment. The average area (**A**) and number of starch grains (**B**) assessed with computer analysis of chloroplasts micrographs of unstressed control (C<sub>3</sub>), NaCl-treated (CAM) and salt-stress withdrawn (-NaCl) *Mesembryanthemum crystallinum* L. plants 48 and 72 hours past osmotic stress. Bars represent mean values ( $\pm$ SD) for  $n=23$ . Different letters indicate statistically significant differences according to Tukey's HSD test at  $p \leq 0.05$ .

**Table S1.** Sequences of primers used during qPCR analysis.

| Name                                     | Accession number            | Sequence (5'-3')         |
|------------------------------------------|-----------------------------|--------------------------|
| PSI-A core protein of PS I               | NC_029049.1<br>:40297-42549 | F: TGAATGTGGTGGACCAAAAA  |
|                                          |                             | R: CGTCCCCAAGATATGTTTTCA |
| PSI-B core subunit of PS I               | AT5G01490<br>: 38067-40271  | F: ATACTGTGCCCAATCCCAAA  |
|                                          |                             | R: GCTCAAAATCCCGATTCAAG  |
| D <sub>1</sub> protein of PS II          | NC_029049.1:<br>:518-1579   | F: GGAAGATCAATCGACCGAAA  |
|                                          |                             | R: CCTTATGCACCCATTTCACA  |
| D <sub>2</sub> protein of PS II          | NC_029049.1<br>:33519-34580 | F: CTGTTCAATTGCGCCCTTAT  |
|                                          |                             | R: CGTGAATAGCGCATAGCAAA  |
| photosystem II core antenna protein CP43 | NC_029049.1<br>:34528-35949 | F: CTTTATTTTGGGGGCGTGTA  |
|                                          |                             | R: GAGCCCATGCAAAAGGTTTA  |
| UBQ – UBIQUITINE                         | AF053563                    | F: CGCACCTTGGCTGACTACA   |
|                                          |                             | R: AACCAACCAGACCATGCAACA |
